# Supplementary material for: Synthesis, Characterization and Solubility Determination of 6-Phenyl-pyridazin-3(2H)-one in Different Pharmaceutical Solvents
Source: PubMed Central journal article supplement (PMC6767300; doi:10.3390/molecules24183404), 2019-09-19
Supplement: molecules-24-03404-s001.pdf [file molecules-24-03404-s001.pdf]

**Supplementary materials**

**Synthesis, Characterization and Solubility Determination of 6-Phenyl-pyridazin-3(2H)-one  
in Different Pharmaceutical Solvents**

**Faiyaz Shakeel<sup>\*1</sup>, Mohd. Imran<sup>2</sup>, Nazrul Haq<sup>1</sup>, Sultan Alshehri<sup>1</sup> and Md. Khalid Anwer<sup>3</sup>**

<sup>1</sup>Department of Pharmaceutics, College of Pharmacy, King Saud University, P.O. Box 2457,  
Riyadh 11451, Saudi Arabia

<sup>2</sup>Department of Pharmaceutical Chemistry, Faculty of Pharmacy, Northern Border University,  
P.O. Box 840, Rafha 919111, Saudi Arabia

<sup>3</sup>Department of Pharmaceutics, College of Pharmacy, Prince Sattam bin Abdulaziz University,  
Al-Kharj, Saudi Arabia

\*Author for correspondence

Dr. Faiyaz Shakeel, Associate Professor,  
Department of Pharmaceutics,  
College of Pharmacy, King Saud University,  
P.O. Box 2457, Riyadh 11451, Saudi Arabia  
Email: faiyazs@fastmail.fm

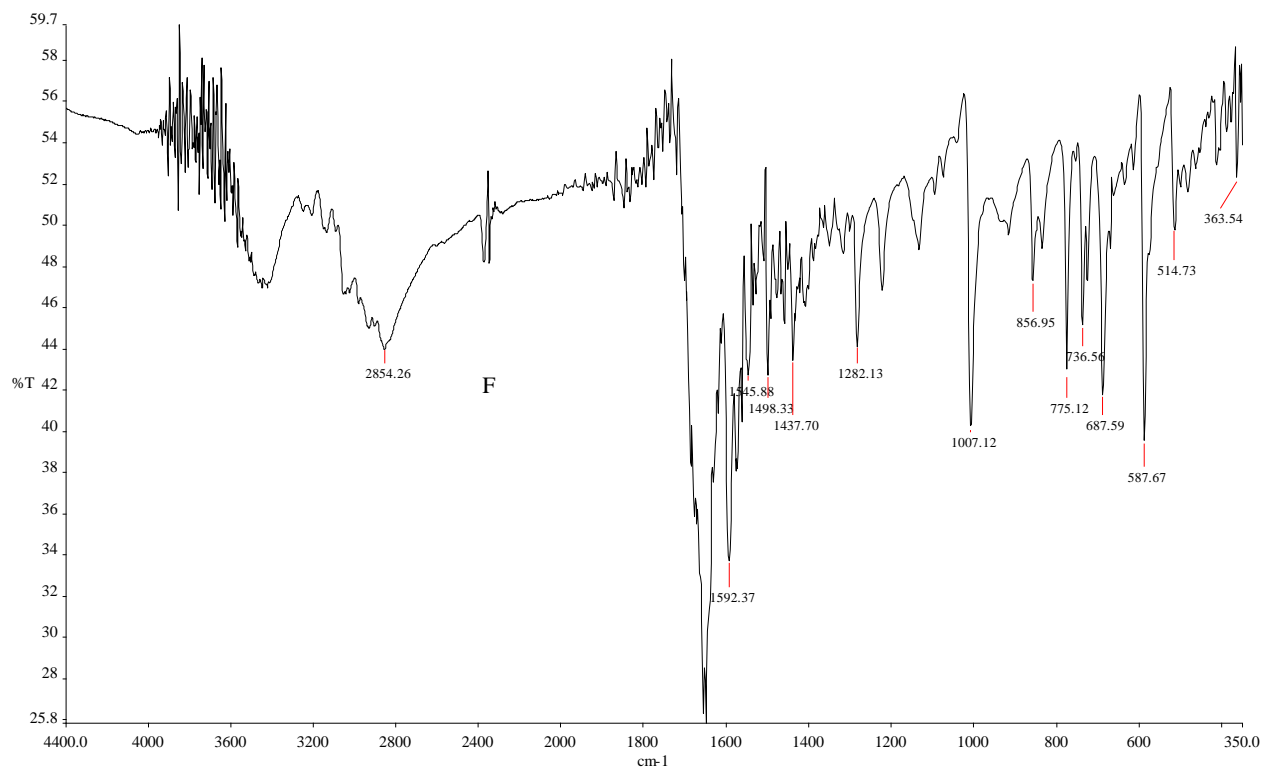

**Figure S1. FT-IR spectra of compound PPD showing some characteristic peaks at different wave numbers.**

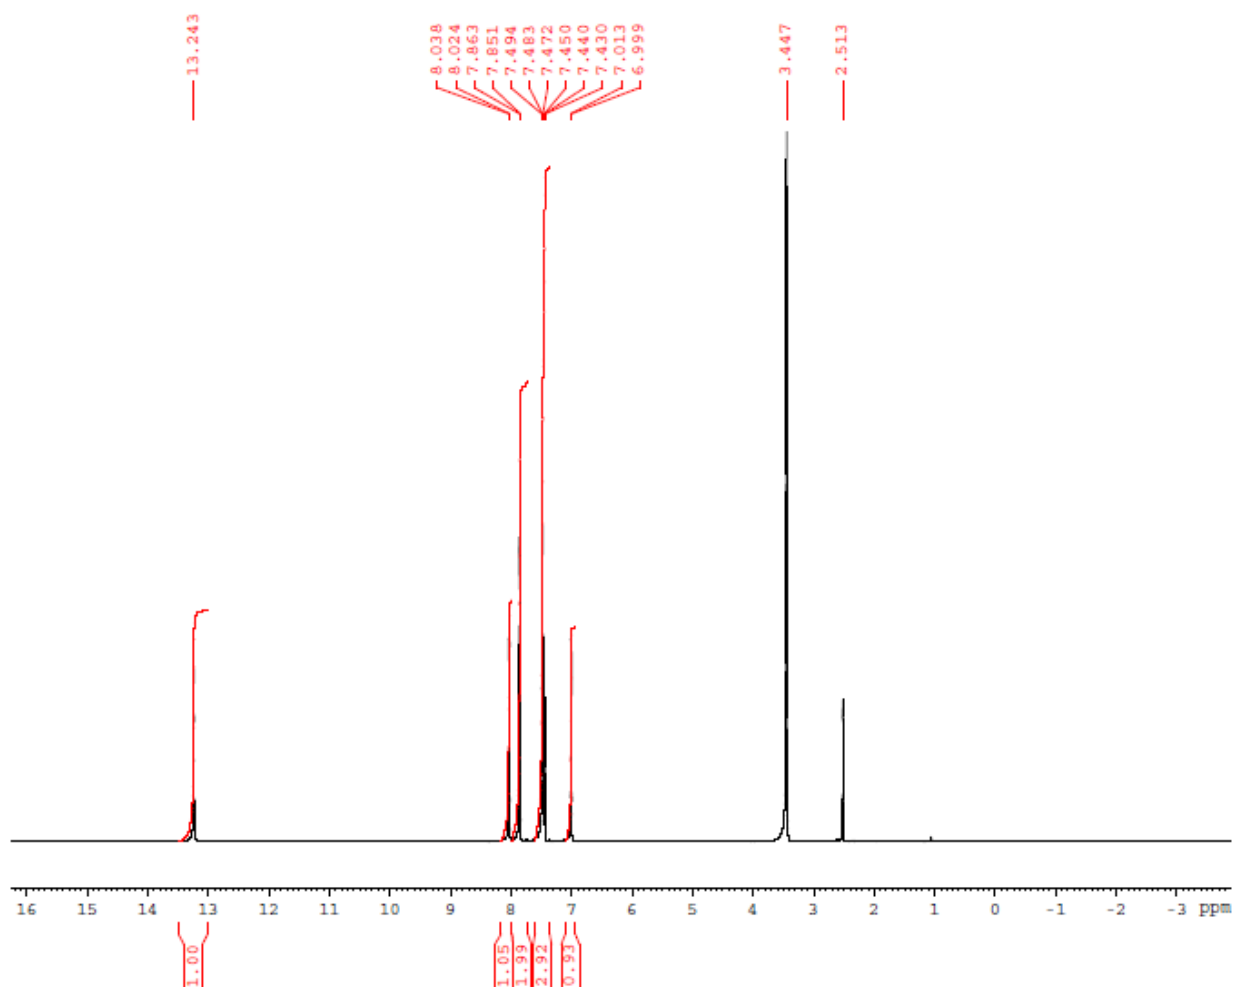

**Figure S2: Proton NMR spectra of compound PPD showing some characteristic peaks at different  $\delta$  values**

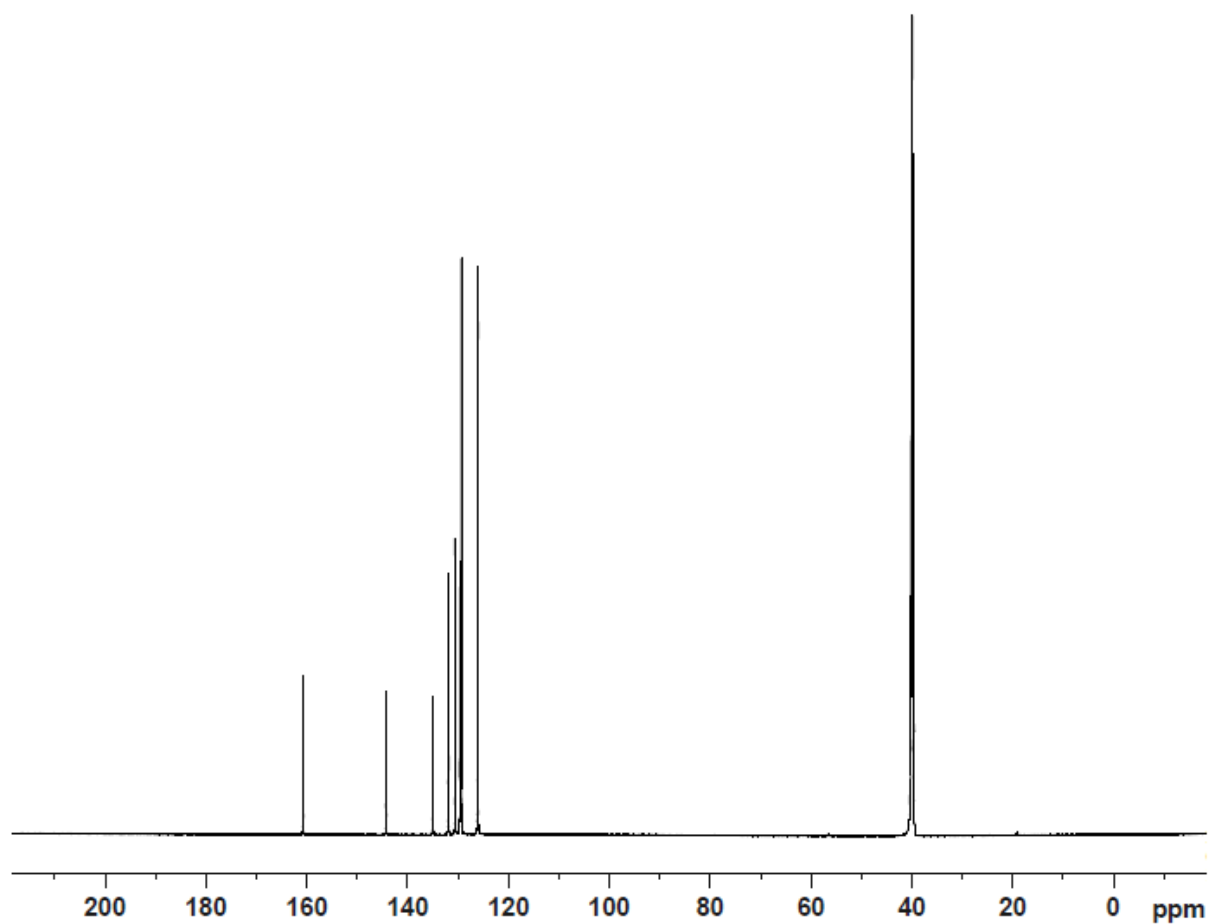

**Figure S3:  $^{13}\text{C}$  NMR spectra of compound PPD showing some characteristic peaks at different  $\delta$  values**

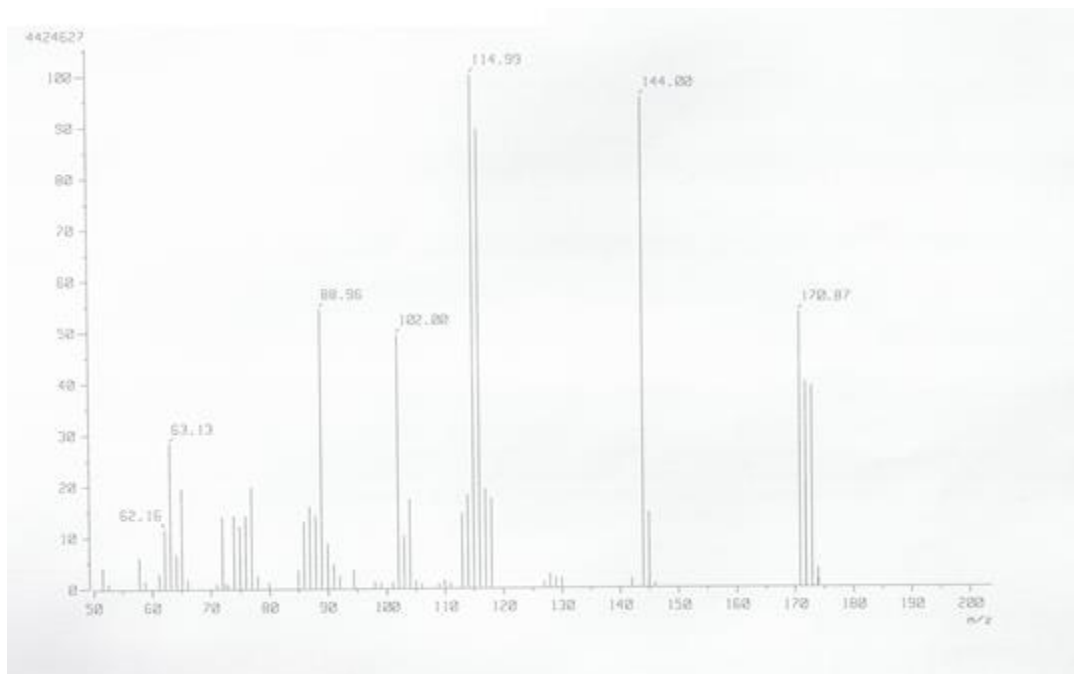

**Figure S4: Mass spectra of compound PPD showing some characteristic peaks at different m/z values**

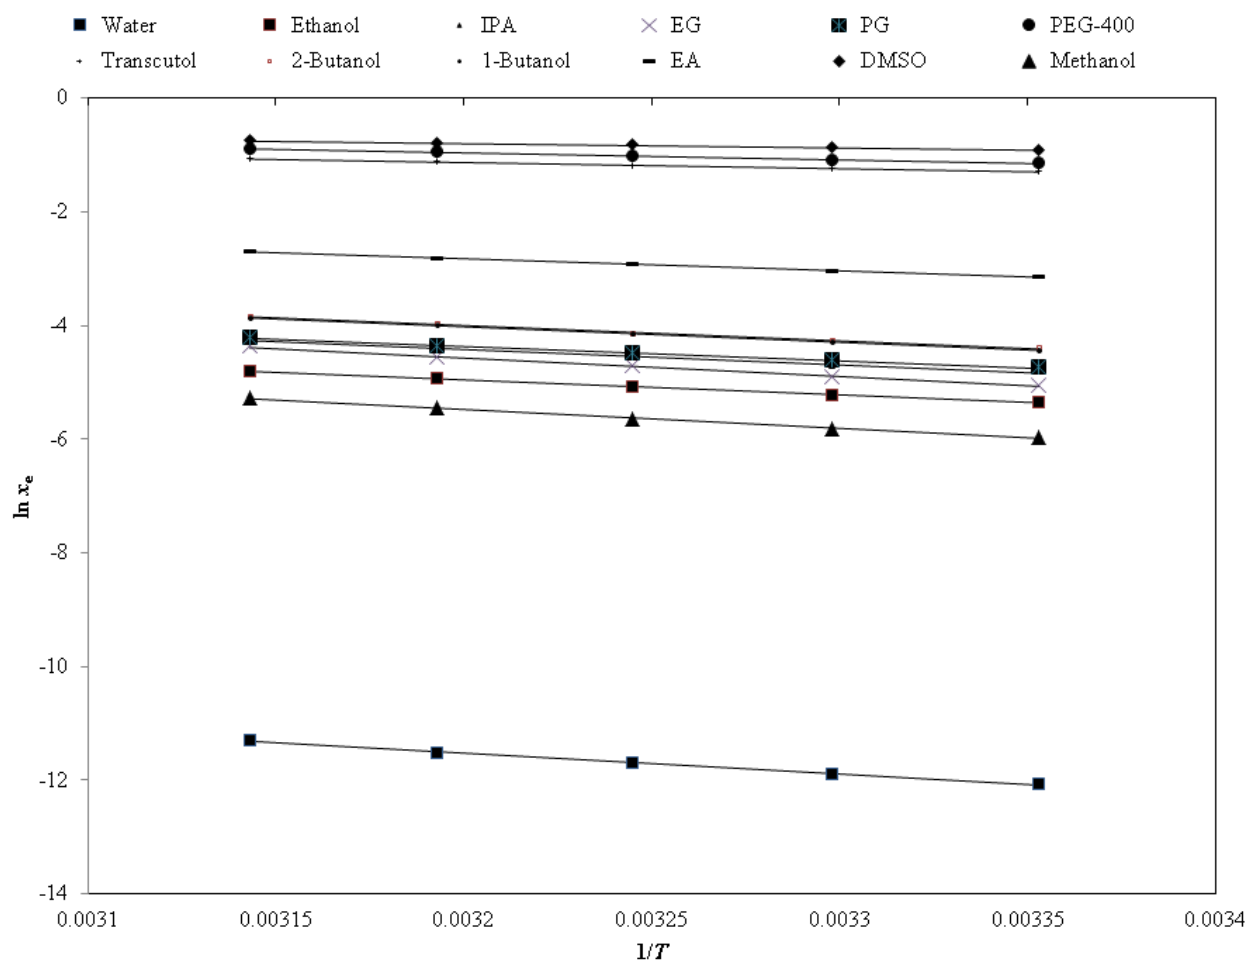

**Figure S5: Correlation of experimental natural logarithmic solubilities ( $\ln x_e$ ) of PPD with “van’t Hoff model” in various neat solvents as a function of  $1/T$ ; symbols represent the experimental  $\ln x_e$  values of PPD and the solid lines represent the  $\ln x^{\text{van't}}$  values calculated by “van’t Hoff model”**

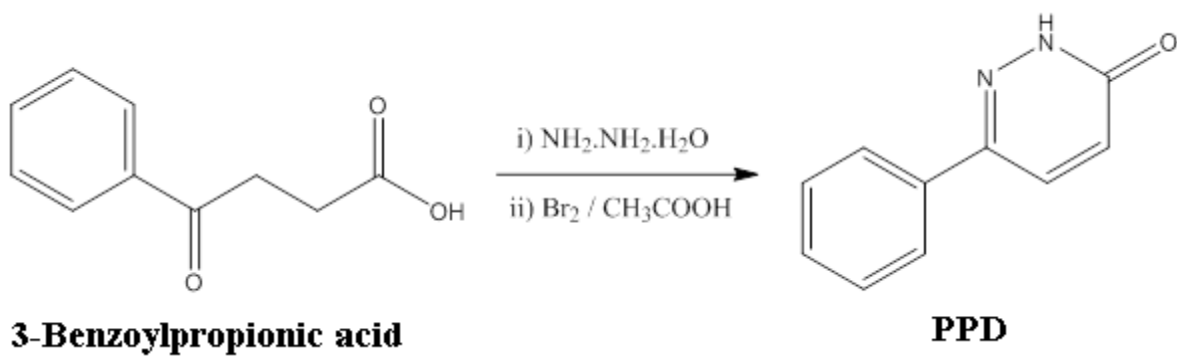

**Figure S6: Scheme for the synthesis of compound PPD**

**Table S1: Elemental analysis of compound PPD in terms of C, H and N**

| Compound | Mass fraction of C (%) |       | Mass fraction of H (%) |       | Mass fraction of N (%) |       |
|----------|------------------------|-------|------------------------|-------|------------------------|-------|
|          | Calculated             | Found | Calculated             | Found | Calculated             | Found |
| PPD      | 69.76                  | 69.75 | 4.68                   | 4.66  | 16.27                  | 16.25 |



**Table S2: The  $\delta$  value of PPD and different neat solvents at  $T = 298.2$  K calculated by HSPiP software**

| Components | Hansen solubility parameters |                             |                             |                           |
|------------|------------------------------|-----------------------------|-----------------------------|---------------------------|
|            | $\delta_d/\text{MPa}^{1/2}$  | $\delta_p/\text{MPa}^{1/2}$ | $\delta_h/\text{MPa}^{1/2}$ | $\delta/\text{MPa}^{1/2}$ |
| PPD        | 20.00                        | 12.90                       | 6.50                        | 24.70                     |
| Water      | 15.50                        | 16.00                       | 42.30                       | 47.80                     |
| Ethanol    | 16.20                        | 8.40                        | 17.60                       | 25.40                     |
| Methanol   | 17.40                        | 10.60                       | 22.40                       | 30.30                     |
| PG         | 17.40                        | 9.10                        | 21.70                       | 29.20                     |
| PEG-400    | 14.60                        | 7.50                        | 9.40                        | 18.90                     |
| Transcutol | 16.30                        | 7.20                        | 11.90                       | 21.40                     |
| EG         | 18.00                        | 11.10                       | 23.40                       | 31.60                     |
| IPA        | 15.80                        | 6.60                        | 14.30                       | 22.30                     |
| 1-Butanol  | 15.90                        | 6.30                        | 15.20                       | 22.90                     |
| 2-Butanol  | 15.80                        | 5.40                        | 12.40                       | 20.80                     |
| EA         | 15.70                        | 5.60                        | 7.00                        | 18.10                     |
| DMSO       | 17.40                        | 14.20                       | 7.30                        | 23.60                     |

**Table S3: Information about materials used in the experiment**

| Material   | Molecular formula                                    | Molar mass (g mol <sup>-1</sup> ) | CAS Registry no. | Purification method | Mass fraction purity | Analysis method | Source        |
|------------|------------------------------------------------------|-----------------------------------|------------------|---------------------|----------------------|-----------------|---------------|
| PPD        | C <sub>10</sub> H <sub>8</sub> N <sub>2</sub> O      | 172.18                            | 2166-31-6        | Recrystallization   | >0.97                | HPLC            | Synthesized   |
| Methanol   | CH <sub>3</sub> OH                                   | 32.04                             | 67-56-1          | None                | >0.99                | GC              | Sigma Aldrich |
| Ethanol    | C <sub>2</sub> H <sub>5</sub> OH                     | 46.07                             | 64-17-5          | None                | >0.99                | GC              | Sigma Aldrich |
| EG         | C <sub>2</sub> H <sub>6</sub> O <sub>2</sub>         | 62.07                             | 107-21-1         | None                | >0.99                | GC              | Fluka Chemica |
| Transcutol | C <sub>6</sub> H <sub>14</sub> O <sub>3</sub>        | 134.17                            | 111-90-0         | None                | >0.99                | GC              | Gattefosse    |
| PG         | C <sub>3</sub> H <sub>8</sub> O <sub>2</sub>         | 76.09                             | 57-55-6          | None                | >0.99                | GC              | Fluka Chemica |
| PEG-400    | H(OCH <sub>2</sub> CH <sub>2</sub> ) <sub>n</sub> OH | 400                               | 25322-68-3       | None                | >0.99                | HPLC            | Fluka Chemica |
| IPA        | C <sub>3</sub> H <sub>8</sub> O                      | 60.10                             | 67-63-0          | None                | >0.99                | GC              | Sigma Aldrich |
| 1-Butanol  | C <sub>4</sub> H <sub>10</sub> O                     | 74.12                             | 71-36-3          | None                | >0.99                | GC              | Sigma Aldrich |
| 2-Butanol  | C <sub>4</sub> H <sub>10</sub> O                     | 74.12                             | 78-92-2          | None                | >0.99                | GC              | Sigma Aldrich |
| DMSO       | C <sub>2</sub> H <sub>6</sub> OS                     | 78.13                             | 67-68-5          | None                | >0.99                | GC              | Fluka Chemica |
| EA         | C <sub>4</sub> H <sub>8</sub> O <sub>2</sub>         | 88.11                             | 141-78-6         | None                | >0.99                | GC              | Fluka Chemica |
| Water      | H <sub>2</sub> O                                     | 18.07                             | 7732-18-5        | None                | -                    | -               | Milli-Q       |

Both the analysis method and purity were provided by supplier except in case of PPD which was synthesized
